# Supplementary material for: Evaluating the Factors Affecting COVID-19 Patients' Mortality in Arak in 2020
Source: Can Respir J. 2022 Sep 16;2022:9594931. doi: 10.1155/2022/9594931 (PMC9507664; doi:10.1155/2022/9594931)
Supplement: Supplementary Materials — Characteristics, laboratory data, and radiologic findings of COVID-19 patients are shown in supplementary Table 1, Table 2, and Table 3, respectively. Moreover, the definition of some medical terms are shown in supplementary text. [file 9594931.f1.zip]

Archive with 3 entries (3 files):
- 9594931.f1/Supplementary table.docx
- 9594931.f1/Supplementary text.docx
- 9594931.f1/waive request.doc
